# Supplementary material for: Enhanced CO2 adsorption on Al-MIL-53 by introducing hydroxyl groups into the framework
Source: Royal Society of Chemistry journal article supplement (doi:10.1039/c6ra09350g), 2016-01-01
Supplement: c6ra09350g1.pdf [file c6ra09350g1.pdf]

Supporting information to

**Enhanced CO<sub>2</sub> adsorption on Al-MIL-53 by introducing hydroxyl groups into the framework**

Jie Yang<sup>a\*</sup>, Xing Yan<sup>a</sup>, Teng Xue<sup>b</sup>, Yongshen Liu<sup>a</sup>

a. School of Mathematics and Physics, Shanghai University of Electric Power,  
Shanghai, 200090, China

b. School of Chemistry and Molecular Engineering, East China Normal University,  
Shanghai, 200062, China

\*Corresponding author. Dr. J. Yang. E-mail addresses: [yj\\_7667@aliyun.com](mailto:yj_7667@aliyun.com)

Table S1 The calculation of amounts of hydroxyl groups by IR spectra.

| Sample                      | A <sub>1</sub> <sup>a</sup><br>(1200-1270 cm <sup>-1</sup> ) | A <sub>2</sub> <sup>b</sup><br>(1550-1680 cm <sup>-1</sup> ) | A <sub>1</sub> /A <sub>2</sub> | (A <sub>1</sub> /A <sub>2</sub> )/0.541 <sup>c</sup> |
|-----------------------------|--------------------------------------------------------------|--------------------------------------------------------------|--------------------------------|------------------------------------------------------|
| Al-MIL-53                   | 0                                                            | 8                                                            | 0                              | 0                                                    |
| Al-MIL-53-OH <sub>25</sub>  | 2.1                                                          | 18.1                                                         | 0.116                          | 0.214                                                |
| Al-MIL-53-OH <sub>50</sub>  | 3.9                                                          | 18.6                                                         | 0.210                          | 0.387                                                |
| Al-MIL-53-OH <sub>75</sub>  | 7.9                                                          | 18.9                                                         | 0.418                          | 0.772                                                |
| Al-MIL-53-OH <sub>100</sub> | 10.5                                                         | 19.4                                                         | 0.541                          | 1                                                    |

- a. Area of IR band due to the vibration of Ar-OH (1200-1270 cm<sup>-1</sup>);
- b. Area of IR band due to the vibration of Ar-COO<sup>-</sup> (1550-1680 cm<sup>-1</sup>);
- c. The ratio of 2,5-dihydroxyl terephthalic acid in the framework calculated referring to the A<sub>1</sub>/A<sub>2</sub> (0.541) of Al-MIL-53-OH<sub>100</sub>.

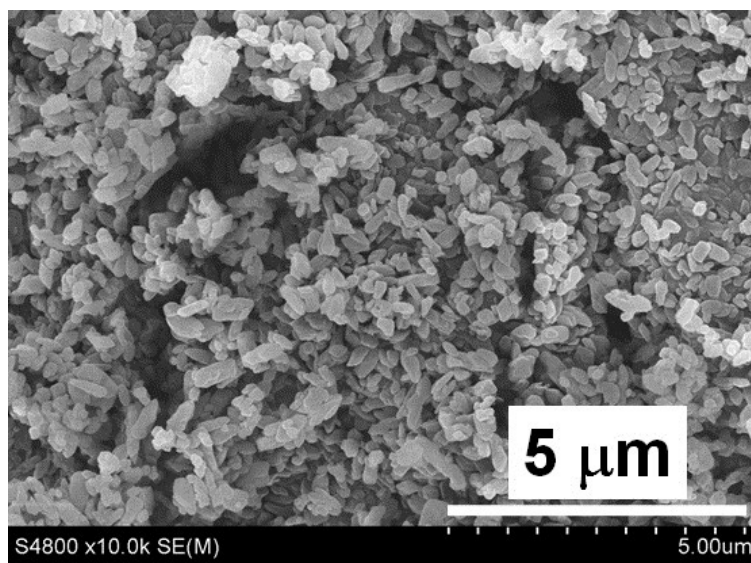

Figure S1. The SEM image of Al-MIL-OH<sub>25</sub> after reuse for 3 times.

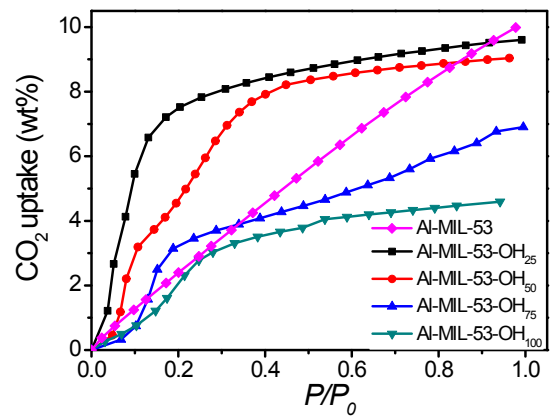

Figure S2 CO<sub>2</sub> adsorption isotherms of hydroxyl modified Al-MIL-53s and Al-MIL-53 at 8 °C.
